# Supplementary material for: Developing a Mediterranean Healthy Food Basket and an Updated Australian Healthy Food Basket Modelled on the Australian Guide to Healthy Eating
Source: MDPI journal article supplement (doi:10.3390/nu15071692), 2023-03-30
Supplement: s1 [file s1]

## Supplementary Information

**Table S1.** Summary of daily energy requirements (~9,500kJ) for a 15-year-old for the HFB from the five food groups

| 15-year-old        | Fruit | Vegetables | Grains | Meat | Dairy |
|--------------------|-------|------------|--------|------|-------|
| Recommended Serves | 2     | 5          | 7      | 2.5  | 3.5   |
| Energy (kJ)        | 700   | 1750       | 3500   | 1500 | 2100  |

**Table S2.** Summary of daily energy requirements (~6,200kJ) for a 7-year-old for the HFB from the five food groups

| 7-year-old         | Fruit | Vegetables | Grains | Meat | Dairy |
|--------------------|-------|------------|--------|------|-------|
| Recommended Serves | 1.5   | 4.5        | 4      | 1.5  | 2     |
| Energy (kJ)        | 525   | 1575       | 2000   | 900  | 1200  |

**Table S3.** Grocery list of foods and quantities in AGHE HFB

| Food/Beverage item            | HH1    | HH2    | HH3    | HH4   |
|-------------------------------|--------|--------|--------|-------|
| <b>Fruit</b>                  |        |        |        |       |
| Apple                         | 1148g  | 1148g  | 906g   | -     |
| Banana                        | 2260g  | 1770g  | 1332g  | 777g  |
| Orange Juice                  | 2383ml | 1439ml | 684.6g | 473ml |
| Mandarin                      | 1725g  | 825g   | 525g   | 375g  |
| Orange                        | 810g   | 810g   | -      | 324g  |
| Kiwifruit                     | -      | -      | 780g   | -     |
| <b>Vegetables and Legumes</b> |        |        |        |       |
| Avocado                       | 126g   | 126g   | 25g    | 25g   |
| Broccoli/Broccolini           | 2170g  | 1747g  | 2323g  | 423g  |
| Carrot                        | 1068g  | 603g   | 775g   | 243g  |
| Corn                          | 71g    | 57g    | -      | 28g   |
| Cucumber                      | 1715g  | 1015g  | 181g   | 181g  |
| Spinach (frozen)              | 1398g  | 808g   | 80g    | 384g  |
| Spinach (fresh)               | 426g   | 426g   | 137g   | 330g  |
| Mixed lettuce                 | 1033g  | 752g   | 297g   | 193g  |
| Mixed vegetables (frozen)     | 900g   | 900g   | 400g   | 400g  |
| Onion                         | 423g   | 302g   | 289g   | 89g   |

|                                                     |       |      |       |      |
|-----------------------------------------------------|-------|------|-------|------|
| Potato                                              | 355g  | 219g | 921g  | 83g  |
| Rocket                                              | 144g  | 86g  | -     | -    |
| Tomato                                              | 1488g | 998g | 422g  | 358g |
| Green beans                                         | -     | -    | 94g   | -    |
| Bok choy                                            | -     | -    | 640g  | -    |
| Passata                                             | -     | -    | 188g  | -    |
| Tinned tomatoes                                     | -     | -    | 464g  | -    |
| <b>Breads and cereals (grain foods)</b>             |       |      |       |      |
| Wholegrain biscuit/cracker                          | 113g  | 113g | 34g   | -    |
| Wholegrain bread roll                               | 210g  | 210g | 70g   | 70g  |
| Wholegrain bread                                    | 1162g | 904g | 1114g | 324g |
| Wholemeal bread                                     | -     | -    | 160g  | -    |
| Whole meal pita bread                               | 141g  | 141g | -     | -    |
| Breakfast cereal (grain, wheat, whole meal)         | 225g  | -    | 98g   | -    |
| Couscous                                            | 276g  | 197g | 79g   | 79g  |
| Whole meal English muffin                           | 67g   | 67g  | 67g   | -    |
| Whole meal pasta                                    | 930g  | 543g | 295g  | 310g |
| Multigrain rice cake                                | 1174g | 774g | -     | 89g  |
| Noodles, hokkien                                    | -     | -    | 255g  | -    |
| Rice cake                                           | -     | -    | 406g  | -    |
| Brown rice                                          | 628g  | 377g | 530g  | 168g |
| Quinoa                                              | -     | -    | 96g   | -    |
| Rolled oats                                         | 680g  | 680g | 144g  | -    |
| Weet-bix                                            | 260g  | 260g | 72g   | -    |
| Wholegrain wrap                                     | 71g   | 71g  | -     | -    |
| Rye wrap                                            | 141g  | 71g  | 142g  | -    |
| Bar from puffed rice                                | 132g  | 132g | -     | -    |
| Bar fruit and nut                                   | 256g  | 256g | 128g  | 192g |
| <b>Lean meats, poultry, fish, eggs, nuts, seeds</b> |       |      |       |      |
| Red kidney beans                                    | 855g  | 617g | 333g  | 285g |
| Chickpeas                                           | 86g   | 86g  | -     | 86g  |
| Chicken breast                                      | 615g  | 389g | 446g  | 113g |
| Lamb chops                                          | 521g  | 337g | -     | 199g |
| Beef strips                                         | -     | -    | 275g  | -    |
| Ham (reduced salt)                                  | -     | -    | 275g  | -    |
| Eggs                                                | 468g  | 384g | 154g  | 84g  |
| Salmon                                              | 245g  | 165g | -     | 65g  |
| Tuna                                                | 490g  | 350g | 523g  | 70g  |
| White fish                                          | -     | -    | 430g  | -    |
| Smoked salmon                                       | 150g  | 110g | -     | 50g  |
| Beef mince                                          | 665g  | 470g | 140g  | 250g |
| Turkey (reduced fat/salt)                           | 120g  | 40g  | -     | -    |

|                                                |        |        |        |        |
|------------------------------------------------|--------|--------|--------|--------|
| Almonds                                        | 181g   | 153g   | -      | 45g    |
| Brazil nuts                                    | 46g    | 40g    | -      | 13g    |
| Walnuts                                        | 8g     | 8g     | -      | -      |
| Pumpkin seeds                                  | 452g   | 331g   | 65g    | 131g   |
| Sunflower seeds                                | -      | -      | 133g   | -      |
| <b>Milk, yoghurt and cheese</b>                |        |        |        |        |
| Fetta (reduced fat)                            | 110g   | 95g    | -      | 55g    |
| Cream cheese (reduced fat)                     | 20g    | 20g    | -      | 20g    |
| Mozzarella cheese (reduced fat)                | 193g   | 139g   | 40g    | 35g    |
| Cheddar cheese (reduced fat)                   | -      | -      | 210g   | -      |
| Cow's Milk (reduced fat)                       | 9962ml | 8178ml | 3933ml | 2111ml |
| Yoghurt (reduced fat)                          | 5070g  | 3250g  | 4615g  | 1387g  |
| <b>Fats and oils</b>                           |        |        |        |        |
| Olive oil                                      | 487ml  | 365ml  | 400ml  | 123ml  |
| Monounsaturated spread (reduced fat)           | 62g    | 25g    | 109g   | 10g    |
| <b>Other</b>                                   |        |        |        |        |
| Coffee powder                                  | 22g    | -      | 45g    | -      |
| Dip, eggplant                                  | 100g   | 100g   | -      | -      |
| Dip, hummus                                    | 165g   | 80g    | -      | -      |
| Dressing, French, fat free                     | 170ml  | 128ml  | -      | 50ml   |
| Chocolate drinking powder, (reduced fat/sugar) | 155g   | 155g   | -      | -      |
| Honey                                          | 36g    | 36g    | 58g    | -      |
| Vegemite spread                                | 5g     | 3g     | 10g    | -      |
| Ready meal, Lasagna                            | 600g   | 400g   | -      | 150g   |
| Peanut butter (reduced fat/salt)               | 15g    | 15g    | 40g    | 10g    |
| Strawberry jam                                 | -      | -      | 56g    | -      |
| Popcorn (reduced fat/salt)                     | 310g   | 220g   | -      | -      |
| Sauce, chili                                   | 56g    | 56g    | 20g    | 28g    |
| Sauce, salsa                                   | 198g   | 176g   | -      | 88g    |
| Sauce, honey soy                               | -      | -      | 136g   | -      |
| Sauce, chutney                                 | -      | -      | 7g     | -      |
| Sauce, garlic aioli                            | -      | -      | 20g    | -      |
| Teabags                                        | 13     | 13     | -      | 13     |
| Balsamic vinegar                               | 56ml   | 42ml   | -      | 14ml   |
| Biscuit, sweet                                 | -      | -      | 130g   | -      |

**Table S4.** Grocery list of foods and quantities in MedDiet HFB

| Food/Beverage item | HH1 | HH2 | HH3 | HH4 |
|--------------------|-----|-----|-----|-----|
| Fruit              |     |     |     |     |

|                                         |        |        |        |       |
|-----------------------------------------|--------|--------|--------|-------|
| Apple                                   | 376g   | 376g   | 435g   | -     |
| Banana                                  | 2207g  | 1887g  | 1443g  | 888g  |
| Orange                                  | 1620g  | 648g   | -      | -     |
| Orange Juice                            | 1943mL | 1628mL | 1155mL | 840mL |
| Kiwifruit                               | 78g    | 78g    | -      | 78g   |
| Mandarin                                | 225g   | 225g   | -      | 75g   |
| Mixed dried fruit                       | 35g    | 35g    | -      | 35g   |
| Mixed berries (frozen)                  | 2712g  | 1782g  | -      | 426g  |
| Grapes                                  | -      | -      | 170g   | -     |
| <b>Vegetables and Legumes</b>           |        |        |        |       |
| Asparagus                               | 238g   | 143g   | -      | -     |
| Spinach (frozen)                        | 1648g  | 1581g  | 181g   | 1016g |
| Spinach (fresh)                         | 618g   | 303g   | -      | 113g  |
| Broccoli                                | 1346g  | 876g   | 1980g  | 240g  |
| Capsicum, red                           | 248g   | 206g   | 233g   | 142g  |
| Carrot                                  | 418g   | 271g   | 494g   | 206g  |
| Celery                                  | -      | -      | 27g    | -     |
| Cauliflower                             | 513g   | 386g   | -      | 162g  |
| Cucumber                                | 276g   | 158g   | 196g   | 20g   |
| Eggplant                                | 100g   | 100g   | 100g   | 100g  |
| Mixed lettuce                           | 403g   | 368g   | 175g   | 70g   |
| Mixed vegetable (frozen)                | 180g   | 180g   | 920g   | -     |
| Mushroom                                | 415g   | 335g   | 173g   | 150g  |
| Onion                                   | 482g   | 407g   | 367g   | 223g  |
| Potato, white                           | 285g   | 235g   | -      | 115g  |
| Potato, sweet                           | 423g   | 172g   | 130g   | 84g   |
| Tomato, fresh                           | 1456g  | 719g   | 367g   | 244g  |
| Passata                                 | 954g   | 767g   | 725g   | 467g  |
| Zucchini                                | 280g   | 234g   | 144g   | 167g  |
| <b>Breads and cereals (grain foods)</b> |        |        |        |       |
| Barley                                  | 49g    | 49g    | -      | 49g   |
| Bread, whole meal                       | 244g   | 178g   |        | 56g   |
| Bread, mixed grain                      | 384g   | 144g   | 396g   | 144g  |
| Bread, pita                             | 528g   | 462g   | 56g    | 462g  |
| Bread, rye & grain                      | 504g   | 364g   | 615g   | 105g  |
| Bread, sourdough                        | 660g   | 512g   | 90g    | -     |
| Wrap, mixed grain                       | 199g   | 199g   | -      | 64g   |
| Pasta, whole meal                       | 543g   | 388g   | 581g   | 155g  |
| Quinoa                                  | 135g   | 135g   | 141g   | 135g  |
| Rice cake, multigrain                   | 580g   | 330g   | -      | 30g   |
| Rice, brown                             | 514g   | 389g   | -      | -     |
| Rolled oats                             | 165g   | 165g   | -      | -     |

|                                                     |         |        |        |        |
|-----------------------------------------------------|---------|--------|--------|--------|
| Lasagne sheets                                      | 42g     | 42g    | 42g    | 42g    |
| Weet-bix                                            | 1023g   | 621g   | 624g   | 291g   |
| <b>Lean meats, poultry, fish, eggs, nuts, seeds</b> |         |        |        |        |
| Bean, butter bean                                   | 180g    | -      | 245g   | -      |
| Bean, chickpea                                      | 173g    | 173g   | 259g   | 173g   |
| Bean, lentil, brown                                 | 361g    | 361g   | 68g    | 185g   |
| Bean, mixed                                         | -       | -      | 190g   | -      |
| Chicken breast                                      | 50g     | 50g    | 230g   | -      |
| Chicken mince                                       | 100g    | 100g   | -      | 100g   |
| Beef mince                                          | 240g    | -      | 60g    | -      |
| Eggs                                                | 664g    | 488g   | 452g   | 167g   |
| Fish, salmon                                        | 268g    | 150g   | -      | 75g    |
| Fish, sardine                                       | 225g    | -      | 870g   | -      |
| Fish, tuna                                          | 770g    | 350g   | 140g   | 140g   |
| Fish, trout                                         | -       | -      | 80g    | -      |
| Fish, white                                         | 145g    | 145g   | 65g    | 65g    |
| Nut, brazil                                         | 17g     | -      | 53g    | -      |
| Nut, walnut                                         | 90g     | 78g    | -      | 30g    |
| Nut, mixed                                          | 101g    | 50g    | 15g    | -      |
| Seed, pumpkin                                       | 330g    | 255g   | 80g    | 75g    |
| Sunflower seed                                      | -       | -      | 20g    | -      |
| <b>Milk, yoghurt and cheese</b>                     |         |        |        |        |
| Cheese, cheddar (reduced fat)                       | 115g    | 75g    | -      | -      |
| Cheese, fetta (reduced fat)                         | 70g     | 50g    | 97g    | 20g    |
| Cheese, mozzarella (reduced fat)                    | 185g    | 185g   | 150g   | 30g    |
| Cheese, parmesan (reduced fat)                      | 5g      | 5g     | 5g     | 5g     |
| Cheese, ricotta (reduced fat)                       | 280g    | 280g   | -      | 200g   |
| Cheese, Swiss                                       | -       | -      | 55g    | -      |
| Cow's Milk (reduced fat)                            | 10690mL | 8512mL | 6252mL | 2393mL |
| Yoghurt, Greek                                      | 3520g   | 2680g  | 1810g  | 840g   |
| <b>Fats and oils</b>                                |         |        |        |        |
| Extra Virgin Olive Oil                              | 1116mL  | 863mL  | 615mL  | 383mL  |
| <b>Other</b>                                        |         |        |        |        |
| Biscuit, sweet                                      | 16g     | 16g    | 36g    | -      |
| Chocolate Drinking powder, (reduced fat/sugar)      | 29g     | 29g    | -      | -      |
| Ham (reduced salt)                                  | 60g     | 60g    | 20g    | 60g    |
| Honey                                               | 41g     | 41g    | 108g   | 12g    |
| Mayonnaise (reduced fat)                            | 28g     | 28g    | 28g    | -      |
| Peanut butter (reduced fat/salt)                    | 40g     | 30g    | 20g    | -      |
| Popcorn (reduced fat/salt)                          | 90g     | 90g    | -      | -      |
| Turkey                                              | 280g    | 185g   | -      | 95g    |
| Dip, eggplant                                       | 60g     | 40g    | -      | 40g    |

|                  |       |       |     |       |
|------------------|-------|-------|-----|-------|
| Dip, hummus      | 140g  | 60g   | 40g | 20g   |
| Balsamic vinegar | -     | -     | 42g | -     |
| Tea bags         | 9     | 9     | 29  | 9     |
| Coconut milk     | 102mL | 102mL | -   | 102mL |

**Table S5.** Grocery list of foods and quantities in Western Diet FB

| Food/Beverage item                                  | HH1    | HH2    | HH3    | HH4    |
|-----------------------------------------------------|--------|--------|--------|--------|
| <b>Fruit</b>                                        |        |        |        |        |
| Apple                                               | -      | -      | 593g   | -      |
| Banana                                              | 838g   | 838g   | 111g   | -      |
| Orange                                              | 1620g  | 1134g  | -      | 1134g  |
| Orange juice                                        | 5824mL | 4524mL | 1603mL | 1040mL |
| Fruit salad, canned                                 | 440g   | 100g   | 408g   | 100g   |
| <b>Vegetables and Legumes</b>                       |        |        |        |        |
| Beans, green, frozen                                | -      | -      | 140g   | -      |
| Broccoli, frozen                                    | -      | -      | 90g    | -      |
| Brussel sprouts                                     | -      | -      | -      | -      |
| Carrot                                              | -      | -      | 83g    | -      |
| Cucumber                                            | -      | -      | 80g    | -      |
| Lettuce                                             | -      | -      | 53g    | -      |
| Mixed vegetables, frozen                            | 43g    | 43g    | 326g   | 43g    |
| Onion                                               | 12g    | -      | 24g    | -      |
| Peas                                                | 125g   | 125g   | -      | -      |
| Potato                                              | 421g   | 380g   | 279g   | -      |
| Snow peas, frozen                                   | -      | -      | 255g   | -      |
| Tomato                                              | 391g   | 331g   | 64g    | -      |
| <b>Breads and cereals (grain foods)</b>             |        |        |        |        |
| White bread                                         | 206g   | 137g   | 824g   | 396g   |
| White bread roll                                    | 1511g  | 1207g  | 276g   | 69g    |
| Breakfast cereal, corn                              | 69g    | 28g    | -      | 28g    |
| Breakfast cereal, rice, cocoa                       | 140g   | 140g   | -      | -      |
| Rolled oats                                         | -      | -      | 60g    | -      |
| Pasta, white                                        | -      | -      | 581g   | -      |
| Snack/Muesli bar (no fruit)                         | 186g   | -      | -      | -      |
| Snack/Muesli bar (chocolate)                        | 312g   | 312g   | 17g    | 68g    |
| Weet-bix                                            | 90g    | 90g    | -      | -      |
| <b>Lean meats, poultry, fish, eggs, nuts, seeds</b> |        |        |        |        |
| Beans, mixed, canned                                | -      | -      | 380g   | -      |
| Beef strips                                         | 400g   | 240g   | -      | 130g   |

|                                            |        |         |        |       |
|--------------------------------------------|--------|---------|--------|-------|
| Chicken breast                             | 311g   | 198g    | -      | 85g   |
| Beef mince                                 | 339g   | 239g    | 350g   | -     |
| Sausages, beef (regular fat)               | 683g   | 481g    | 505g   | 202g  |
| Mixed nuts                                 | 92g    | 20g     | 86g    | 20g   |
| <b>Milk, yoghurt, and cheese</b>           |        |         |        |       |
| Cheese, cheddar (regular fat)              | 399g   | 294g    | 252g   | 63g   |
| Cheese, parmesan (regular fat)             | -      | -       | 80g    | -     |
| Cow's milk (regular fat)                   | 4512mL | 30000mL | 1241mL | 876mL |
| <b>Fats and oils</b>                       |        |         |        |       |
| Butter/margarine spread (regular fat/salt) | 264g   | 197g    | 176g   | 76g   |
| Canola oil                                 | 487g   | 365g    | 324g   | 163g  |
| <b>Other</b>                               |        |         |        |       |
| Coffee powder                              | 11g    | -       | 21     | -     |
| Gravy powder                               | 77g    | 58g     | 60g    | 19g   |
| Vegemite                                   | 20g    | 15g     | 27g    | 5g    |
| Peanut butter                              | 112g   | 78g     | -      | 68g   |
| Tomato sauce                               | 291g   | 270g    | -      | -     |
| Tea bags                                   | 7      | 7       | 12     | 7     |
| Chocolate bar                              | 175g   | 175g    | -      | -     |
| Biscuit, sweet                             | 63g    | 56g     | 72g    | 56g   |
| Biscuit, Anzac                             | -      | -       | 221g   | -     |
| Biscuit, wafer style                       | -      | -       | 14g    | -     |
| Cake                                       | 485g   | 485g    | -      | -     |
| Chicken Kiev (frozen)                      | 471g   | 351g    | 438g   | 120g  |
| Chicken nuggets (frozen)                   | 320g   | 320g    | -      | -     |
| Chips, potato, packet                      | 380g   | 320g    | 200g   | 240g  |
| Chips, potato (frozen)                     | 1020g  | 720g    | 410g   | 240g  |
| Chocolate milk/Iced coffee                 | 120mL  | 120mL   | 250mL  | -     |
| Beef, corned, sliced                       | 390g   | 286     | 358    | -     |
| Jelly/jube lollies                         | 379g   | 181g    | 23g    | -     |
| Drinking chocolate powder                  | 12g    | 12g     | -      | -     |
| Frozen meal (beef pasta)                   | 300g   | -       | 1583g  | -     |
| Fish cake, frozen                          | -      | -       | 350g   | -     |
| Garlic aioli                               | -      | -       | 50g    | -     |
| Honey                                      | 40g    | 40g     | 57g    | -     |
| Ice cream, caramel                         | 660    | 660mL   | -      | -     |
| Ice cream, coffee                          | 792mL  | -       | 528mL  | -     |
| Ice cream, cookies and cream               | 396mL  | 396mL   | 99mL   | -     |
| Ice cream, vanilla choc chip               | 660mL  | 660mL   | 396mL  | 660mL |
| Jam, strawberry flavoured                  | 38g    | 38g     | 90g    | 8g    |
| Muffin, berry flavoured                    | 1640   | 980g    | -      | 815   |
| Pie, meat and cheese                       | 568g   | 394g    | 138g   | 175g  |

|                           |        |        |        |      |
|---------------------------|--------|--------|--------|------|
| Pikelets                  | 125g   | 125g   | -      | -    |
| Pizza, chicken, and bacon | 106g   | 106g   | -      | -    |
| Pizza, ham, and cheese    | 500g   | 300g   | -      | 300g |
| Pizza, meat lovers        | 531g   | 319g   | -      | 213g |
| Pudding, sticky date      | -      | -      | 1080g  | -    |
| Salami                    | 288g   | 219g   | -      | 69g  |
| Sauce, chocolate          | 308g   | 308g   | -      | -    |
| Sauce, pasta cream based  | -      | -      | 1060g  | -    |
| Sausage roll              | 910    | 650    | -      | 260g |
| Soft drink, coca cola     | 3358mL | 1408mL | -      | -    |
| Soft drink, lemonade      | 455mL  | -      | 1500mL | -    |
| Sugar, white              | 59g    | 29g    | -      | 29g  |
| Syrup, maple flavoured    | 10mL   | 10mL   | -      | -    |



**Table S6.** Example meals for AGHE HFB

|     | Breakfasts                                                                                                                                                                                                                                                                                                                             | Lunches                                                                                                                                                                                                                                                                                                                                                                                                                                                                                                                                | Dinners                                                                                                                                                                                                                                                                                                                                                                                                                                                | Snacks                                                                                                                                                                                                                                      |
|-----|----------------------------------------------------------------------------------------------------------------------------------------------------------------------------------------------------------------------------------------------------------------------------------------------------------------------------------------|----------------------------------------------------------------------------------------------------------------------------------------------------------------------------------------------------------------------------------------------------------------------------------------------------------------------------------------------------------------------------------------------------------------------------------------------------------------------------------------------------------------------------------------|--------------------------------------------------------------------------------------------------------------------------------------------------------------------------------------------------------------------------------------------------------------------------------------------------------------------------------------------------------------------------------------------------------------------------------------------------------|---------------------------------------------------------------------------------------------------------------------------------------------------------------------------------------------------------------------------------------------|
| 70F | <ul style="list-style-type: none"> <li>• 0.5c rolled oats, 1c reduced fat milk, pinch cinnamon, 1 banana and 1tsp honey</li> <li>• 2x slices grain bread, 1c spinach, 2 eggs, 2tsp reduced fat monounsaturated spread</li> <li>• 2x slices grain bread, 20g peanut butter, 1 banana 2tsp reduced fat monounsaturated spread</li> </ul> | <ul style="list-style-type: none"> <li>• 2x slices grain bread with salt 50g ham, 21g reduced fat cheese with salad items (onion, lettuce, tomato), 1tsp chutney</li> <li>• 1 grain or rye wrap with 50g roast chicken breast, 1c lettuce and salad, 2tsp garlic aioli</li> <li>• 75g tin tuna, 4x whole meal crispbreads, 25g onion, 30g tomato</li> <li>• 1 medium potato (~230g), 0.75c kidney beans, 0.5c tomato paste, 0.75c broccolini (steamed), 2tsp reduced fat monounsaturated spread, 20g reduced fat mozzarella</li> </ul> | <ul style="list-style-type: none"> <li>• 75g fish with 0.75c potato, 1c broccoli and 0.75c carrot</li> <li>• 1c pasta, 75g beef mince, ¼ onion, 0.75c passata, 10g reduced fat mozzarella</li> <li>• 1c brown rice, 65g stir fried beef strips, 0.5c bok choy, 0.6c broccoli</li> <li>• 113g chicken breast fried in oil, 0.25c carrot (steamed), 0.75c broccoli (fried with chicken breast), 0.25c quinoa cooked in water, 1tb chili sauce</li> </ul> | <ul style="list-style-type: none"> <li>• 1.5c reduced fat yoghurt with apple</li> <li>• ½ whole meal English muffin with ½tbsp strawberry jam</li> <li>• Coffee/tea with yoyos</li> <li>• 1.25c yoghurt with 10g sunflower seeds</li> </ul> |
| 70M | <ul style="list-style-type: none"> <li>• 0.75c rolled oats, 1c reduced fat milk, pinch cinnamon, 1 banana and 1tsp honey, 15g pumpkin seeds</li> <li>• 2x slices grain bread, 1c spinach, 2 eggs, 2tsp</li> </ul>                                                                                                                      | <ul style="list-style-type: none"> <li>• Grain bread roll (~70g), 50g reduced salt ham, 25g onion, 1.5c lettuce/spinach, 31g tomato, 21g reduced fat cheese</li> <li>• 1 grain or rye wrap with 50g reduced salt ham, 1c lettuce and salad, 2tsp garlic aioli</li> </ul>                                                                                                                                                                                                                                                               | <ul style="list-style-type: none"> <li>• 75g fish with 0.75c potato, 1c broccoli and 0.75c carrot</li> <li>• 1c pasta, 75g beef mince, ¼ onion, 0.75c passata, 10g reduced fat mozzarella</li> <li>• 0.6c brown rice, 75g stir fried beef strips, 0.5c bok choy, 0.5c broccoli</li> </ul>                                                                                                                                                              | <ul style="list-style-type: none"> <li>• 1.25c yoghurt with 15g sunflower seeds, 5g sunflower seeds</li> <li>• ½ whole meal English muffin with ½tbsp strawberry jam, kiwifruit</li> <li>• Coffee/tea with yoyos</li> </ul>                 |

|     |                                                                                                                                                                                                                                                                                                                                                     |                                                                                                                                                                                                                                                                                                                                                                                                                                                                                                                                                    |                                                                                                                                                                                                                                                                                                                                                                                                                                                                                                                                                             |                                                                                                                                                                                                                                                                                                                                                         |
|-----|-----------------------------------------------------------------------------------------------------------------------------------------------------------------------------------------------------------------------------------------------------------------------------------------------------------------------------------------------------|----------------------------------------------------------------------------------------------------------------------------------------------------------------------------------------------------------------------------------------------------------------------------------------------------------------------------------------------------------------------------------------------------------------------------------------------------------------------------------------------------------------------------------------------------|-------------------------------------------------------------------------------------------------------------------------------------------------------------------------------------------------------------------------------------------------------------------------------------------------------------------------------------------------------------------------------------------------------------------------------------------------------------------------------------------------------------------------------------------------------------|---------------------------------------------------------------------------------------------------------------------------------------------------------------------------------------------------------------------------------------------------------------------------------------------------------------------------------------------------------|
|     | <p>reduced fat monounsaturated spread</p> <ul style="list-style-type: none"> <li>• 0.75c bran flake/wheat bran cereal, 1c milk, pinch cinnamon, 1 banana, drizzle honey, 20g sunflower seeds</li> </ul>                                                                                                                                             | <ul style="list-style-type: none"> <li>• 75g tin tuna, 4x whole meal crispbreads, 25g onion, 30g tomato</li> </ul>                                                                                                                                                                                                                                                                                                                                                                                                                                 | <ul style="list-style-type: none"> <li>• 0.75c hokkien noodles, 0.5c carrot, 0.5c bok choy, 85g chicken breast, 0.25c honey soy sauce</li> </ul>                                                                                                                                                                                                                                                                                                                                                                                                            |                                                                                                                                                                                                                                                                                                                                                         |
| 44F | <ul style="list-style-type: none"> <li>• 0.75c rolled oats, 1c reduced fat milk, pinch cinnamon, 1 banana, 15g pumpkin seeds</li> <li>• 80g weet-bix, 1c reduced fat milk, pinch cinnamon, 1 banana, 18g pumpkin seeds</li> <li>• 2x slices grain bread, 1tsp reduced fat monounsaturated spread, 120g tomato, 50g spinach with a banana</li> </ul> | <ul style="list-style-type: none"> <li>• 2x slice grain bread, 15g reduced fat mozzarella, 1tsp reduced fat monounsaturated spread, 1.5c salad (lettuce, spinach, onion)</li> <li>• Mixed grain bread roll (~70g), 2cups salad (lettuce, spinach, onion), 2tsp reduced fat monounsaturated spread</li> <li>• 2x slice grain bread, 50g reduced salt ham, 50g spinach, 60g tomato, 1tsp reduced fat monounsaturated spread, 25g onion</li> <li>• 50g smoked salmon, 2x slices grain bread, 25g avocado, 2x eggs, 1.5c baby spinach fried</li> </ul> | <ul style="list-style-type: none"> <li>• 65g fish with 0.5c brown rice, 1c broccoli and 0.75c carrot, 1tb chili sauce</li> <li>• 1c whole meal pasta, 65g beef mince, 0.25c kidney beans, 0.75c passata, 10g reduced fat mozzarella, ½ small carrot, 50g spinach</li> <li>• 0.25c couscous cooked in water, 0.75c broccoli, 27g carrot, 50g spinach fried in oil with 85g chicken breast, 45g reduced fat fetta crumbled on top</li> <li>• 60g beef mince, 0.5c kidney beans, 1tbsp corn kernels, 0.25c brown rice, 70g spinach, 2tb salsa sauce</li> </ul> | <ul style="list-style-type: none"> <li>• 0.6c yoghurt, 15g almonds</li> <li>• Tea/coffee with fruit and nut bar</li> <li>• 70g tuna, 2 whole meal corn thins/crispbreads</li> <li>• Tea/coffee with mandarin and fruit and nut bar</li> <li>• Tea/coffee with 4x whole meal crispbreads/biscuits, 40g cucumber, 20g cream cheese reduced fat</li> </ul> |

|     |                                                                                                                                                                                                                                                                                                                                             |                                                                                                                                                                                                                                                                                                                                                            |                                                                                                                                                                                                                                                                                                                                                                                                                                                                                                                  |                                                                                                                                                                                                                                                                          |
|-----|---------------------------------------------------------------------------------------------------------------------------------------------------------------------------------------------------------------------------------------------------------------------------------------------------------------------------------------------|------------------------------------------------------------------------------------------------------------------------------------------------------------------------------------------------------------------------------------------------------------------------------------------------------------------------------------------------------------|------------------------------------------------------------------------------------------------------------------------------------------------------------------------------------------------------------------------------------------------------------------------------------------------------------------------------------------------------------------------------------------------------------------------------------------------------------------------------------------------------------------|--------------------------------------------------------------------------------------------------------------------------------------------------------------------------------------------------------------------------------------------------------------------------|
| 44M | <ul style="list-style-type: none"> <li>• 2x slice mixed grain bread, 5g vegemite, 1tsp reduced fat monounsaturated spread, 200ml orange juice</li> <li>• 75g breakfast cereal (grain, rice, oat), 1.5c reduced fat milk, banana</li> <li>• 2x slices grain bread, 1tsp hummus, ½ small tomato, 10g onion, 1/2 cup spinach/rocket</li> </ul> | <ul style="list-style-type: none"> <li>• 2x slice whole meal bread, 30g turkey, 1.5c lettuce, 0.5c salad items (tomato, onion, cucumber), 1tsp reduced fat monounsaturated spread</li> <li>• 2small lamb chops (~92g) cooked in olive oil, 2c salad greens (lettuce, spinach, tomato, cucumber), 0.25c brown rice, 15g fat free French dressing</li> </ul> | <ul style="list-style-type: none"> <li>• 80g salmon fried in olive oil, 0.75c brown rice cooked, 0.75c carrot, ½ potato and 0.6c carrot boiled, 1tb tartare sauce</li> <li>• 1c whole meal pasta, 65g mince beef cooked in olive oil, 0.5c kidney beans, 0.75c passata, ½ carrot, 1c spinach leaves and 20g reduced fat mozzarella</li> <li>• 0.25c couscous cooked in water, 0.75c broccoli, ¼ medium carrot fried in oil with 1 small chicken breast (~113g), 20g reduced fat fetta crumbled on top</li> </ul> | <ul style="list-style-type: none"> <li>• Coffee with air-popped popcorn (salt reduced), 15g pumpkin seeds</li> <li>• 1c yoghurt with 10g pumpkin seeds</li> <li>• 2tbsp hummus, 1 small carrot and ½ small cucumber</li> </ul>                                           |
| 15F | <ul style="list-style-type: none"> <li>• 45g Weetabix (~3 biscuits), 1.5c reduced fat milk, 25g pumpkin seeds, 1 banana, pinch cinnamon</li> <li>• 0.6c rolled oats, 1c reduced fat milk, 1 banana, 25g pumpkin seeds, pinch cinnamon</li> </ul>                                                                                            | <ul style="list-style-type: none"> <li>• 2x slice grain bread with 50g shredded/roast chicken breast, 10g reduced fat mozzarella cheese, 1.5c lettuce, onion, 1tb hummus</li> <li>• Whole meal pita bread, 20g reduced fat mozzarella cheese, 1.5c lettuce/spinach, onion, 1tb eggplant dip</li> </ul>                                                     | <ul style="list-style-type: none"> <li>• 50g salmon fried in olive oil, 0.5c brown rice, 0.75c carrot and 1c broccoli steamed, 1tb chili sauce</li> <li>• 1c whole meal pasta, 55g beef mince fried with 0.25c kidney beans, 0.75c passata, ½ small carrot, 100g frozen mixed</li> </ul>                                                                                                                                                                                                                         | <ul style="list-style-type: none"> <li>• Fruit and nut bar with 220ml orange juice</li> <li>• 25g air-popped popcorn (reduced salt), 1tb eggplant dip, 100g cucumber</li> <li>• 28g almonds, 1c yoghurt, hot chocolate (1tb drinking chocolate powder reduced</li> </ul> |

|    |                                                                                                                                                                                                                                                                                                                                                                  |                                                                                                                                                                                                                                                                                                                                                           |                                                                                                                                                                                                                                                                                                                                                                                                                                                                                                                                           |                                                                                                                                                                                                                                                                                                                                                          |
|----|------------------------------------------------------------------------------------------------------------------------------------------------------------------------------------------------------------------------------------------------------------------------------------------------------------------------------------------------------------------|-----------------------------------------------------------------------------------------------------------------------------------------------------------------------------------------------------------------------------------------------------------------------------------------------------------------------------------------------------------|-------------------------------------------------------------------------------------------------------------------------------------------------------------------------------------------------------------------------------------------------------------------------------------------------------------------------------------------------------------------------------------------------------------------------------------------------------------------------------------------------------------------------------------------|----------------------------------------------------------------------------------------------------------------------------------------------------------------------------------------------------------------------------------------------------------------------------------------------------------------------------------------------------------|
|    |                                                                                                                                                                                                                                                                                                                                                                  | <ul style="list-style-type: none"> <li>1 grain or whole meal wrap (~71g), 70g tuna, 1tsp tartare sauce, 1c lettuce, 0.5c spinach/rocket, onion, cucumber</li> </ul>                                                                                                                                                                                       | vegetables 20g mozzarella cheese reduced fat <ul style="list-style-type: none"> <li>0.5c couscous cooked in water, 155g broccoli fried with 95g chicken breast and ¼ medium carrot, 20g reduced fat fetta cheese crumbled on top</li> </ul>                                                                                                                                                                                                                                                                                               | sugar + 0.25c reduced fat milk) <ul style="list-style-type: none"> <li>25g air-popped popcorn, 1 orange</li> <li>1c yoghurt, 4 brazil nuts</li> </ul>                                                                                                                                                                                                    |
| 7M | <ul style="list-style-type: none"> <li>0.5c rolled oats, 1c reduced fat milk, 1 banana, 15g pumpkin seeds, 10g almonds, drizzle honey</li> <li>2x slices grain bread toasted with 1tsp reduced fat monounsaturated spread, 1tsp vegemite and 1 banana</li> <li>1x slice grain bread toasted with 25g avocado, 2 eggs, 1.5c spinach and 1 small tomato</li> </ul> | <ul style="list-style-type: none"> <li>2x slices grain bread, 15g turkey, 10g reduced fat mozzarella cheese, 1c lettuce, onion, 2tb hummus, 60g tomato</li> <li>Grain bread roll (~52g), 70g tuna, 10g reduced fat cheese, 1c lettuce, onion</li> <li>Whole meal pita bread, 1tb hummus, 25g turkey, 15g reduced fat cheese, 1c lettuce, onion</li> </ul> | <ul style="list-style-type: none"> <li>50g fried salmon, 0.25c brown rice, 0.75c steamed carrot and broccoli, 1tb tartare sauce</li> <li>0.5c whole meal pasta, 55g beef mince fried in oil with 0.5c kidney beans, 0.5c passata, 10g reduced fat mozzarella cheese, ½ small carrot, 50g spinach</li> <li>0.25c couscous, 1c broccoli, 85g chicken breast, 10g reduced fat fetta cheese crumbled on top</li> <li>1 small lamb chop (~46g) fried in olive oil, 1c lettuce, 1 tomato, olives, 0.25c cucumber, 5g French dressing</li> </ul> | <ul style="list-style-type: none"> <li>Medium apple (~164g) and fruit and nut bar</li> <li>Hot chocolate (1tsp drinking chocolate powder reduced sugar + 1c reduced fat milk)</li> <li>200ml orange juice, 1 slice grain bread, 10g peanut butter (reduced sugar and salt)</li> <li>1 multigrain rice cake or crispbread, 5-10g peanut butter</li> </ul> |

**Table S7.** Example meals for MedDiet HFB

|     | Breakfasts                                                                                                                                                                                                                                                                                                                                  | Lunches                                                                                                                                                                                                                                                                                                                                              | Dinners                                                                                                                                                                                                                                                                                                                                 | Snacks                                                                                                                                                                                                                                                                                 |
|-----|---------------------------------------------------------------------------------------------------------------------------------------------------------------------------------------------------------------------------------------------------------------------------------------------------------------------------------------------|------------------------------------------------------------------------------------------------------------------------------------------------------------------------------------------------------------------------------------------------------------------------------------------------------------------------------------------------------|-----------------------------------------------------------------------------------------------------------------------------------------------------------------------------------------------------------------------------------------------------------------------------------------------------------------------------------------|----------------------------------------------------------------------------------------------------------------------------------------------------------------------------------------------------------------------------------------------------------------------------------------|
| 70F | <ul style="list-style-type: none"> <li>• Omelet: 2x eggs with 70g tomato and mushroom, 10g fetta cheese, 100ml milk fried in EVOO with 2x slices of bread</li> <li>• Peanut butter on 2x slices of multigrain bread</li> <li>• 180g Greek yoghurt with honey, 1 banana</li> <li>• 3 weetabix with 1.25c milk, honey and 1 banana</li> </ul> | <ul style="list-style-type: none"> <li>• 150g sardines on cruskits with 15g mayonnaise</li> <li>• White bean soup served with 1 slice of bread drizzled with 1tb EVOO</li> <li>• Grain flat bread with 0.25c passata soffrito sauce, 20g lean leg ham, 1.5c vegetables (0.5c mushrooms, 30g onion, 0.37c capsicum), 30g mozzarella cheese</li> </ul> | <ul style="list-style-type: none"> <li>• Zucchini patties serves with 1.5c salad vegetables and 1tb EVOO</li> <li>• 65g white fish served with roast veg (40g pumpkin and 120g broccoli)</li> <li>• 1c whole meal pasta with 50g chicken breast fried in 2tb EVOO, 0.25c passata soffrito sauce with 0.75c steamed broccoli</li> </ul>  | <ul style="list-style-type: none"> <li>• 150g Greek yoghurt with honey</li> <li>• Tea with 2x biscuits (i.e., yoyo)</li> <li>• 30g mixed nuts</li> <li>• 25g Swiss cheese or ricotta with multigrain crackers</li> <li>• 40g hummus with cucumber and carrot sticks (~100g)</li> </ul> |
| 70M | <ul style="list-style-type: none"> <li>• Omelet: 2x eggs with 70g tomato and mushroom, 10g fetta cheese, 100ml milk fried in EVOO with 2x slices of bread</li> <li>• 4x Weetabix with 1.25c milk, honey and 1x banana</li> </ul>                                                                                                            | <ul style="list-style-type: none"> <li>• 150g sardines on cruskits with 15g mayonnaise</li> <li>• Grain flat bread with 0.25c passata soffrito sauce, 0.25c butter beans, 1.5c vegetables (0.5c mushrooms, 30g onion, 0.37c capsicum), 30g mozzarella cheese</li> </ul>                                                                              | <ul style="list-style-type: none"> <li>• Zucchini patties serves with 1.5c salad vegetables and 1tb EVOO, 0.5c quinoa</li> <li>• 80g trout or salmon with roast vegetables (40g pumpkin, 100g broccoli) roasted in 2tb EVOO</li> <li>• 1c whole meal pasta with 50g chicken breast fried in 2tb EVOO, 0.25c passata soffrito</li> </ul> | <ul style="list-style-type: none"> <li>• 120g Greek yoghurt, 10g pumpkin seeds, honey</li> <li>• 30g Swiss cheese or ricotta with multigrain crackers</li> <li>• 0.75c mashed butter beans with cucumber and carrot sticks (~60g)</li> </ul>                                           |

|     |                                                                                                                                                                                                                                                                                                                        |                                                                                                                                                                                                                                                                          |                                                                                                                                                                                                                                                                                                                                          |                                                                                                                                                                                                                                                                |
|-----|------------------------------------------------------------------------------------------------------------------------------------------------------------------------------------------------------------------------------------------------------------------------------------------------------------------------|--------------------------------------------------------------------------------------------------------------------------------------------------------------------------------------------------------------------------------------------------------------------------|------------------------------------------------------------------------------------------------------------------------------------------------------------------------------------------------------------------------------------------------------------------------------------------------------------------------------------------|----------------------------------------------------------------------------------------------------------------------------------------------------------------------------------------------------------------------------------------------------------------|
|     |                                                                                                                                                                                                                                                                                                                        |                                                                                                                                                                                                                                                                          | sauce with 0.75c steamed broccoli                                                                                                                                                                                                                                                                                                        |                                                                                                                                                                                                                                                                |
| 44F | <ul style="list-style-type: none"> <li>• 4x Weetabix with 1.5c milk, honey, 10g walnuts and banana</li> <li>• 2x slices of multigrain bread, 20g eggplant dip, 1x tomato and spinach</li> <li>• Smoothie with 120g yoghurt, 0.5c fruit, 1.5c milk and 2x Weetabix</li> </ul>                                           | <ul style="list-style-type: none"> <li>• Whole meal flat bread pizza with 1/2c capsicum, 20g cheese, 2tb EVOO, 1/2c passata, 50g shredded turkey</li> <li>• Turkey wrap with hummus and 1.5c mixed salad vegetables</li> <li>• Lentil soup</li> <li>• Lasagna</li> </ul> | <ul style="list-style-type: none"> <li>• 140g tuna on 2x slices bread with onion and spinach</li> <li>• 70g fish fried in EVOO with 2cups mixed vegetables (broccoli, cauliflower, asparagus, spinach)</li> <li>• 1c wholemeal pasta with 60g beef mince fried in 2tb EVOO, 1/4c passata, 10g cheese 1cup vegetables</li> </ul>          | <ul style="list-style-type: none"> <li>• 120g yoghurt with 0.75c fruit</li> <li>• 20g eggplant dip with carrot and cucumber sticks</li> <li>• 120g yoghurt and 20g mixed nuts</li> </ul>                                                                       |
| 44M | <ul style="list-style-type: none"> <li>• 4x Weetabix with 1.5c milk, 20g walnuts, 10g sunflower seeds</li> <li>• Peanut butter on multigrain toast</li> <li>• 120g Greek yoghurt, 1.25c mixed berries, 1.25c milk, 2x weet-bix</li> <li>• 2x eggs, 1tb EVOO to fry tomato and mushroom, 2x slices rye bread</li> </ul> | <ul style="list-style-type: none"> <li>• Whole meal flat bread pizza with 1/2c capsicum, 20g cheese, 2tb EVOO, 1/2c passata, 50g shredded turkey</li> <li>• Lentil soup</li> <li>• Lasagna</li> </ul>                                                                    | <ul style="list-style-type: none"> <li>• 140g sardines on 2x slices bread with onion and 1.5c spinach</li> <li>• 70g fish fried in EVOO with 2cups mixed vegetables (broccoli, cauliflower, asparagus, spinach)</li> <li>• 1c wholemeal pasta with 65g beef mince fried in 2tb EVOO, 1/4c passata, 10g cheese 1cup vegetables</li> </ul> | <ul style="list-style-type: none"> <li>• 80g hummus with cucumber and carrot sticks</li> <li>• 30g nuts/dried fruit</li> <li>• 120g Greek yoghurt with 1c fruit</li> <li>• 15g pumpkin seeds and orange</li> <li>• 1tin tuna on multigrain crackers</li> </ul> |

|     |                                                                                                                                                                                                                                                                                                                                                     |                                                                                                                                                                                                                                                                                                                                                                                |                                                                                                                                                                                                                                                                                                                                                                         |                                                                                                                                                                                                                          |
|-----|-----------------------------------------------------------------------------------------------------------------------------------------------------------------------------------------------------------------------------------------------------------------------------------------------------------------------------------------------------|--------------------------------------------------------------------------------------------------------------------------------------------------------------------------------------------------------------------------------------------------------------------------------------------------------------------------------------------------------------------------------|-------------------------------------------------------------------------------------------------------------------------------------------------------------------------------------------------------------------------------------------------------------------------------------------------------------------------------------------------------------------------|--------------------------------------------------------------------------------------------------------------------------------------------------------------------------------------------------------------------------|
| 15F | <ul style="list-style-type: none"> <li>• 4x Weetabix with 1.5c milk, honey and 30g pumpkin seeds</li> <li>• 20g Peanut butter, banana and cinnamon on 2x slices of toast</li> <li>• 170g Greek yoghurt with honey, 1c fruit and 1.5c milk</li> <li>• 2x eggs in 1tb EVOO, 20g cheese, 100g fried vegetables (mushroom, tomato, zucchini)</li> </ul> | <ul style="list-style-type: none"> <li>• 2x slices of rye bread with 1tb basil pesto, 50g chicken, 2cups salad vegetables and 20g mozzarella cheese</li> <li>• Whole meal flat bread pizza with 1/2c capsicum and mushroom, 50g cheese, 2tb EVOO, 1/2c passata</li> <li>• 50g turkey, 1 mixed grain wrap, 2tb hummus, 15g mozzarella cheese and 2c salad vegetables</li> </ul> | <ul style="list-style-type: none"> <li>• 80g fish in 2tb EVOO with roast veg (60g pumpkin and potato, 100g broccoli)</li> <li>• 140g tuna on 2x slices of bread with 1.5c salad vegetables, EVOO and 15g mayonnaise</li> <li>• 0.75c whole meal pasta, 2tb EVOO, 1/4c basil pesto sauce, 10g mozzarella cheese, 130g broccoli, 1.5 home-made chicken patties</li> </ul> | <ul style="list-style-type: none"> <li>• Hot chocolate (1.5c milk and 1tsp drinking chocolate powder)</li> <li>• 170g greek yoghurt with 1.5c fruit and 1x crushed Weetabix</li> <li>• Air-popped popcorn 30g</li> </ul> |
| 7M  | <ul style="list-style-type: none"> <li>• 0.75c rolled oats with 1c milk and 1.5c mixed fruit</li> <li>• Peanut butter and banana on 2x slices of whole meal toast</li> <li>• 3x Weetabix with 1.25c milk, 1c mixed fruit and 10g pumpkin seeds</li> <li>• 1 egg, tomato and mushrooms fried in EVOO with 2x slice of rye bread</li> </ul>           | <ul style="list-style-type: none"> <li>• 2x slice whole meal bread, 20g cheese, 50g mince beef 2tb passata</li> <li>• Whole meal flat bread pizza with 1/2c capsicum and mushroom, 50g cheese, 2tb EVOO, 1/2c passata</li> <li>• Cheese and salad mixed grain wrap</li> </ul>                                                                                                  | <ul style="list-style-type: none"> <li>• Home-made chicken patties with roasted vegetables (60g pumpkin, 60g potato, 60g broccoli)</li> <li>• 70g tuna on 2x slices of rye bread with onion and spinach, 15g mayonnaise</li> <li>• 50g salmon baked in EVOO, 0.25c each broccoli, cauliflower and asparagus, 15g tomato sauce</li> </ul>                                | <ul style="list-style-type: none"> <li>• Air-popped popcorn + mandarin</li> <li>• Hot chocolate (1.5c milk and 1tsp drinking chocolate powder)</li> <li>• 100 greek yoghurt with 0.25c mixed berries</li> </ul>          |

**Table S8.** Example meals for Western Diet food basket

|     | Breakfasts                                                                                                                                                                                                                                                                                           | Lunches                                                                                                                                                                                                                                                                                                                                                                                                    | Dinners                                                                                                                                                                                                                                                                                                                                                                                                                                                       | Snacks                                                                                                                                                                                                                                                                                               |
|-----|------------------------------------------------------------------------------------------------------------------------------------------------------------------------------------------------------------------------------------------------------------------------------------------------------|------------------------------------------------------------------------------------------------------------------------------------------------------------------------------------------------------------------------------------------------------------------------------------------------------------------------------------------------------------------------------------------------------------|---------------------------------------------------------------------------------------------------------------------------------------------------------------------------------------------------------------------------------------------------------------------------------------------------------------------------------------------------------------------------------------------------------------------------------------------------------------|------------------------------------------------------------------------------------------------------------------------------------------------------------------------------------------------------------------------------------------------------------------------------------------------------|
| 70F | <ul style="list-style-type: none"> <li>• 2x slices white bread with butter and vegemite and 200ml orange juice</li> <li>• 2x slices white bread with butter and strawberry jam and 150ml orange juice</li> <li>• 34g (1 sachet) quick oats, 0.75c regular fat milk and 150ml orange juice</li> </ul> | <ul style="list-style-type: none"> <li>• 2x slices white bread with 150g corned beef, cheese, 0.5c lettuce, 25g onion and margarine</li> <li>• Chicken and vegetable pie (138g) with 0.25c frozen peas carrot and corn</li> <li>• 2.5 (97g) fried eggs in butter on 2x slices white bread with margarine</li> <li>• 200g beef lasagna (commercial) with 0.25c each snow peas and carrot steamed</li> </ul> | <ul style="list-style-type: none"> <li>• 2.5x beef sausages regular fat, 0.5c boiled potato and 0.75c green beans with 0.25c gravy and 250ml lemonade</li> <li>• 150g crumbed fish cake with 70g oven roasted potato chips, 0.5c steamed broccoli and 25g garlic aioli</li> <li>• 0.75c pasta with 1c creamy pasta sauce, 15g parmesan cheese</li> <li>• 85g fried beef mince on a bread roll with margarine, cheese, lettuce, tomato and cucumber</li> </ul> | <ul style="list-style-type: none"> <li>• Tea/coffee with 2x Anzac biscuits</li> <li>• 90g sticky date pudding with 99g ice cream (1.5 scoops)</li> <li>• Tea/coffee with chocolate chip muffin</li> <li>• 4x wafer style biscuits with 20g cucumber and 42g cheese and 200ml orange juice</li> </ul> |
| 70M | <ul style="list-style-type: none"> <li>• 2x slices white bread with butter and vegemite and 220ml orange juice</li> <li>• 2x slices white bread with butter and strawberry jam</li> <li>• 2x slices white bread with butter and honey</li> </ul>                                                     | <ul style="list-style-type: none"> <li>• 2x slices white bread with 210g corned beef, cheese</li> <li>• Chicken and vegetable pie (183g)</li> <li>• 3 (117g) fried eggs on 2x slices white bread with margarine</li> </ul>                                                                                                                                                                                 | <ul style="list-style-type: none"> <li>• 2.5x beef sausages regular fat, 0.25c boiled potato and 0.25c green beans with 0.25c gravy and 250ml lemonade</li> <li>• 200g crumbed fish fake with 90g oven roasted potato chips, 0.25c</li> </ul>                                                                                                                                                                                                                 | <ul style="list-style-type: none"> <li>• Tea/coffee with 1 small Anzac biscuit and 20g mixed nuts</li> <li>• Tea/coffee and 40g packet potato chips</li> </ul>                                                                                                                                       |



|     |                                                                                                                                                                                                                                                                                                           |                                                                                                                                                                                                                                                                                     |                                                                                                                                                                                                                                                                                                                                                                            |                                                                                                                                                                                                                              |
|-----|-----------------------------------------------------------------------------------------------------------------------------------------------------------------------------------------------------------------------------------------------------------------------------------------------------------|-------------------------------------------------------------------------------------------------------------------------------------------------------------------------------------------------------------------------------------------------------------------------------------|----------------------------------------------------------------------------------------------------------------------------------------------------------------------------------------------------------------------------------------------------------------------------------------------------------------------------------------------------------------------------|------------------------------------------------------------------------------------------------------------------------------------------------------------------------------------------------------------------------------|
|     | <ul style="list-style-type: none"> <li>• 2x slices white bread with butter and honey with 0.75c canned fruit salad</li> </ul>                                                                                                                                                                             | <ul style="list-style-type: none"> <li>• 400g beef lasagna (commercial) with 90g oven roasted potato chips</li> </ul>                                                                                                                                                               | steamed broccoli and tsp garlic aioli <ul style="list-style-type: none"> <li>• 1c pasta with 1.25c creamy pasta sauce, 20g parmesan cheese</li> <li>• 100g fried beef mince on a bread roll with margarine, cheese</li> </ul>                                                                                                                                              | <ul style="list-style-type: none"> <li>• 90g sticky date pudding with 66g ice cream (1 scoop)</li> </ul>                                                                                                                     |
| 44F | <ul style="list-style-type: none"> <li>• 2x slices white bread with butter and vegemite</li> <li>• 2x slices peanut butter and margarine on toast with an orange</li> <li>• Corn flake breakfast cereal ½c with 1c milk</li> <li>• 2x slices white bread with margarine and jam and an orange</li> </ul>  | <ul style="list-style-type: none"> <li>• 2x slices of white bread with margarine, regular fat cheese and 2x slices roast beef</li> <li>• Ham and cheese pizza</li> <li>• Sausage roll</li> <li>• 2x slices white bread with 70g pepperoni, full fat cheese and margarine</li> </ul> | <ul style="list-style-type: none"> <li>• 120g chicken kiev with 80g oven baked potato chips</li> <li>• Chicken breast (85g) roll with butter and cheese</li> <li>• Meat lovers pizza</li> <li>• 100g beef rissole with 80g oven roasted potato chips</li> <li>• 65g beef stir fried in canola oil, 80g potato chips oven roasted, 0.25c frozen peas carrot corn</li> </ul> | <ul style="list-style-type: none"> <li>• Orange and a berry muffin</li> <li>• 2 scoops ice cream</li> <li>• Tea/coffee with potato chips</li> <li>• Sweet biscuit with 250ml orange juice</li> </ul>                         |
| 44M | <ul style="list-style-type: none"> <li>• 2x slices white bread with margarine and tomato</li> <li>• Corn flake breakfast cereal ½c with 1.5c milk</li> <li>• 2x slices bread with butter and vegemite</li> <li>• 2x slices white bread with peanut butter and margarine and 250ml orange juice</li> </ul> | <ul style="list-style-type: none"> <li>• 2x slices of white bread with margarine, regular fat cheese and 2x slices roast beef</li> <li>• Sausage roll</li> <li>• 2x slices white bread with 70g pepperoni, full fat cheese and margarine, onion and tomato</li> </ul>               | <ul style="list-style-type: none"> <li>• 120g chicken kiev with 90g oven baked potato chips</li> <li>• Chicken breast (113g) roll with butter and cheese</li> <li>• Ham and cheese pizza</li> <li>• 100g beef rissole with 100g oven roasted potato chips and tomato sauce</li> </ul>                                                                                      | <ul style="list-style-type: none"> <li>• Muesli bar and potato chips</li> <li>• Tea/coffee with sugar and a sweet muffin</li> <li>• 2 scoops ice cream with 120g canned fruit salad</li> <li>• Handful mixed nuts</li> </ul> |

|     |                                                                                                                                                                                                                                                                                                                   |                                                                                                                                                                                                                                                                                                                                                           |                                                                                                                                                                                                                                                                                                                                                                               |                                                                                                                                                                                                                                                                                                                     |
|-----|-------------------------------------------------------------------------------------------------------------------------------------------------------------------------------------------------------------------------------------------------------------------------------------------------------------------|-----------------------------------------------------------------------------------------------------------------------------------------------------------------------------------------------------------------------------------------------------------------------------------------------------------------------------------------------------------|-------------------------------------------------------------------------------------------------------------------------------------------------------------------------------------------------------------------------------------------------------------------------------------------------------------------------------------------------------------------------------|---------------------------------------------------------------------------------------------------------------------------------------------------------------------------------------------------------------------------------------------------------------------------------------------------------------------|
| 15F | <ul style="list-style-type: none"> <li>• 2x slices white bread with margarine and honey</li> <li>• 3x weet-bix with 1c milk and 1 small banana</li> <li>• 3x pikelets with margarine, maple syrup and a banana</li> </ul>                                                                                         | <ul style="list-style-type: none"> <li>• 2x slices of white bread with margarine, regular fat cheese and 1x slice roast beef</li> <li>• Sausage roll and 200ml coca cola</li> <li>• 2x slices white bread with 2x slices pepperoni, cheese and sliced tomato</li> <li>• 4 chicken nuggets (80g) with 1tb tomato sauce and 2 slices white bread</li> </ul> | <ul style="list-style-type: none"> <li>• 131g chicken Kiev with 0.5c mash potato (added butter, cheese, salt, pepper)</li> <li>• Chicken breast (85g) roll with butter and cheese, tomato sauce and sliced tomato</li> <li>• Chicken and bacon pizza with tomato sauce</li> <li>• 85g beef rissole with 80g oven roasted potato chips, ½ a tomato, 200ml coca cola</li> </ul> | <ul style="list-style-type: none"> <li>• 250ml orange juice and a berry muffin</li> <li>• 45g milk chocolate with 2 scoops ice cream</li> <li>• Chocolate snack bar with 200ml coca cola</li> <li>• 80g potato chips and 200ml coca cola or orange juice</li> <li>• 2x scoop ice cream with jube lollies</li> </ul> |
| 7M  | <ul style="list-style-type: none"> <li>• 45g rice-based cocoa cereal with 1.25c full fat milk and 1 banana</li> <li>• 2x slices white bread with butter and vegemite</li> <li>• 2x pikelets with 1tsp margarine, 1tsp maple syrup and a banana</li> <li>• 2x slices white bread with jam and margarine</li> </ul> | <ul style="list-style-type: none"> <li>• 2x slices white bread with 2 slices roast beef, margarine, cheddar cheese and tomato</li> <li>• Sausage roll</li> <li>• 2x slices white bread with 2x slices pepperoni, cheese and sliced tomato</li> <li>• 4 chicken nuggets (~80g) with 60g potato chips, 1tb tomato sauce and 200ml coca cola</li> </ul>      | <ul style="list-style-type: none"> <li>• 100g chicken kiev with 0.25c mash potato (added butter, cheese, salt, pepper)</li> <li>• Meat lovers pizza (~100g or ¼)</li> <li>• Chicken breast (30g) roll with margarine, cheese and sliced tomato</li> <li>• 60g beef rissole with 60g oven roasted potato chips</li> </ul>                                                      | <ul style="list-style-type: none"> <li>• Chocolate puffed rice bar with 250ml orange juice</li> <li>• 1 scoop ice cream with 2tb chocolate sauce</li> <li>• Berry muffin with 250ml orange juice</li> </ul>                                                                                                         |
